# Supplementary material
Source: PubMed Central journal article supplement (PMC1805602)
Supplement: pnas_0611293104_4.pdf [file pnas_0611293104_4.pdf]

|         |   |   |   |   |   |   |   |      |
|---------|---|---|---|---|---|---|---|------|
| Tn5     | E | T | P | L | K | W | L | W298 |
| Tn10    | E | - | P | - | - | W | I | W265 |
| Rest    | V | T | P | - | K | W | L | W141 |
| Hermes? | E | C | P | T | R | W | N | W319 |
| RAG1?   | M | K | P | V | - | W | R | W893 |
