# Supplementary material
Source: PubMed Central journal article supplement (PMC1805602)

Ab: 0 C2t C1t S1t S2t  
 23RSS: - + - + - + - + - +

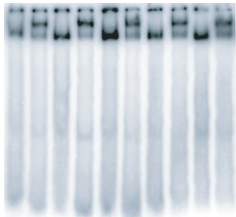

%PC 38 40 37 32 36  
 %SC 46 49 50 41 51

C2b C1b S1b S2b 0  
 - + - + - + - + - +

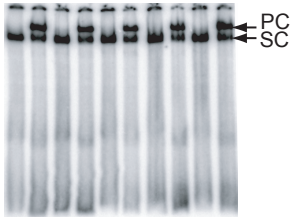

35 28 29 24 27  
 49 41 47 41 47

Supplement: pnas_0611293104_1.pdf [file pnas_0611293104_1.pdf]

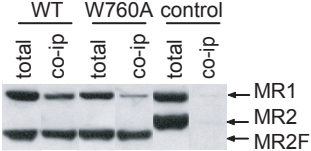

Supplement: pnas_0611293104_2.pdf [file pnas_0611293104_2.pdf]

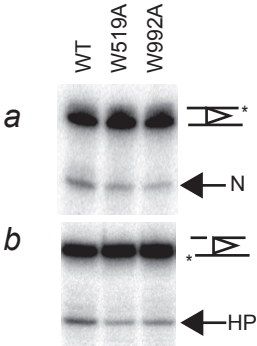

Supplement: pnas_0611293104_3.pdf [file pnas_0611293104_3.pdf]
